# Supplementary material for: Biomolecular phase separation through the lens of sodium‐23 NMR
Source: PubMed Central journal article supplement — Protein Sci. 2020 Dec 22;30(7):1315–25. doi: 10.1002/pro.4010 (PMC8197435; doi:10.1002/pro.4010), 2020-12-22
Supplement: PRO-30-1315-s001.pdf [file PRO-30-1315-s001.pdf]

# **Biomolecular phase separation through the lens of sodium-23 NMR**

Juan Carlos Fuentes-Monteverde,<sup>a</sup> Stefan Becker,<sup>a</sup> Nasrollah Rezaei-Ghaleh<sup>a,b\*</sup>

<sup>a</sup> Department for NMR-based Structural Biology, Max Planck Institute for Biophysical Chemistry, Göttingen, Germany

<sup>b</sup> Department of Neurology, University Medical Center Göttingen, Göttingen, Germany

**\*Correspondence to:**

Dr. Nasrollah Rezaei-Ghaleh, Max Planck Institute for Biophysical Chemistry, Am Faßberg 11, 37077 Göttingen, Germany. Fax: +49-(0)551-2012202; E-Mail: [nrezaei@gwdg.de](mailto:nrezaei@gwdg.de)

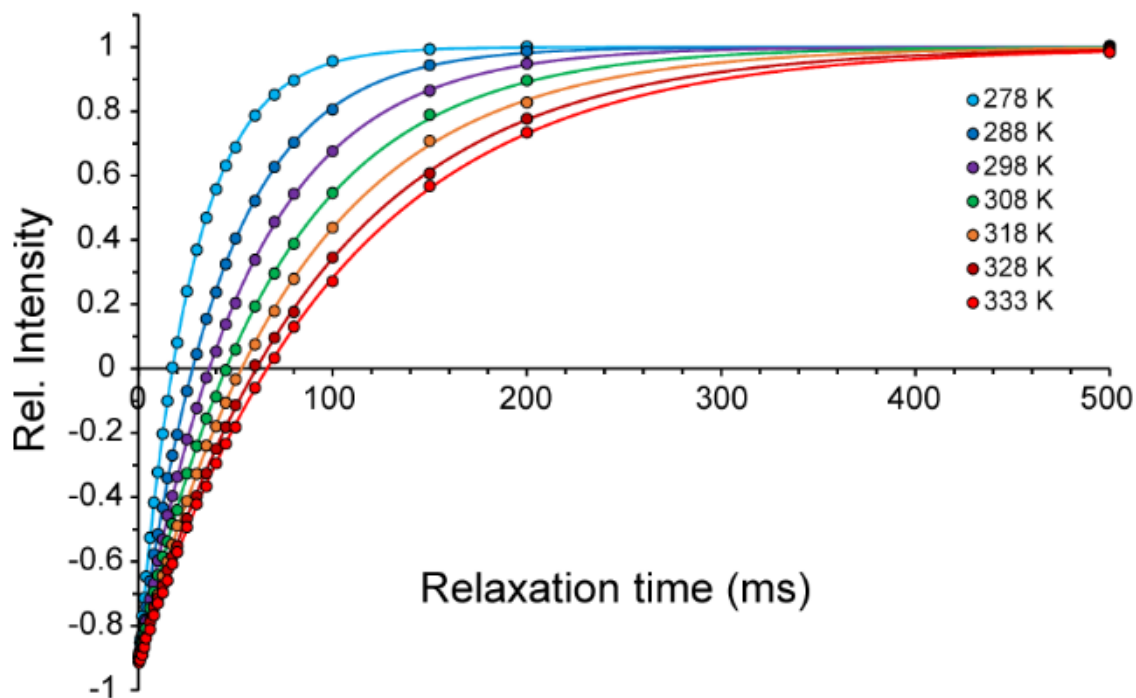

**Figure S1.** Temperature dependence of  $^{23}\text{Na}$  longitudinal relaxation ( $R_1$ ) rates in 100 mM NaCl solution. Recovery of  $^{23}\text{Na}$  signal intensity following 180-degree inversion is shown at different temperatures ranging from 278 K to 333 K. The  $^{23}\text{Na}$  signal intensities follow single-exponential recovery curves. More rapid recoveries are observed at lower temperatures.

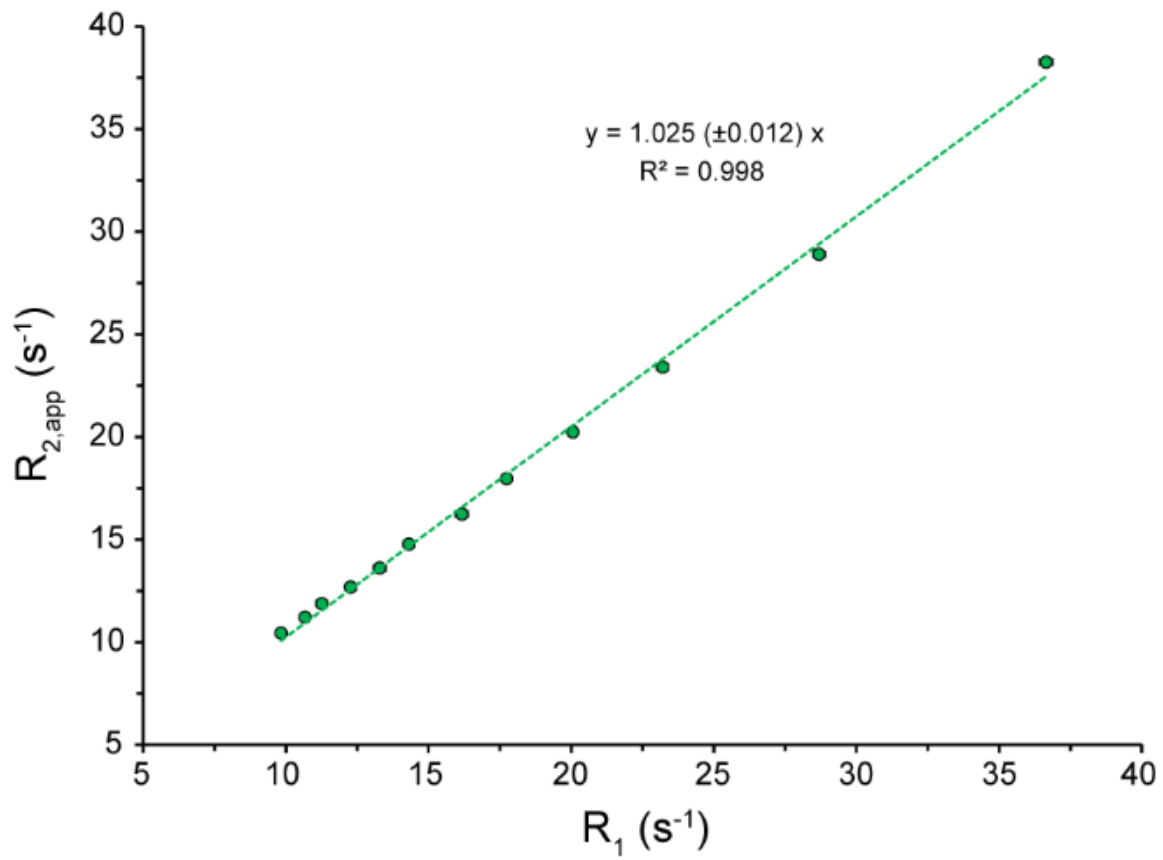

**Figure S2.** The <sup>23</sup>NaCl longitudinal relaxation ( $R_1$ ) and linewidth-based apparent transverse relaxation ( $R_{2,app}$ ) rates measured in the temperature range 278-333 K show strong correlation and a nice fit to a line with a slope close to 1. The error bars are smaller than the symbol size.

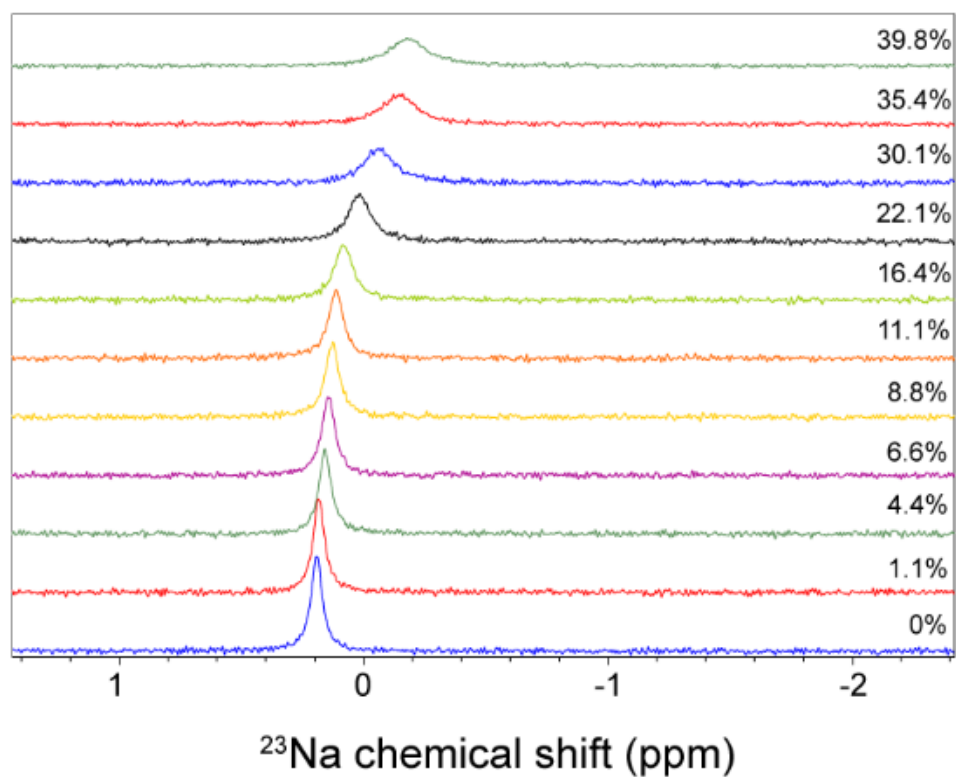

**Figure S3.** Viscosity dependence of  $^{23}\text{NaCl}$  NMR in glycerol-water mixtures. 1D  $^{23}\text{Na}$  NMR spectra show gradual peak displacement towards lower chemical shifts and broadening in dependence of glycerol (v/v, %) concentration.

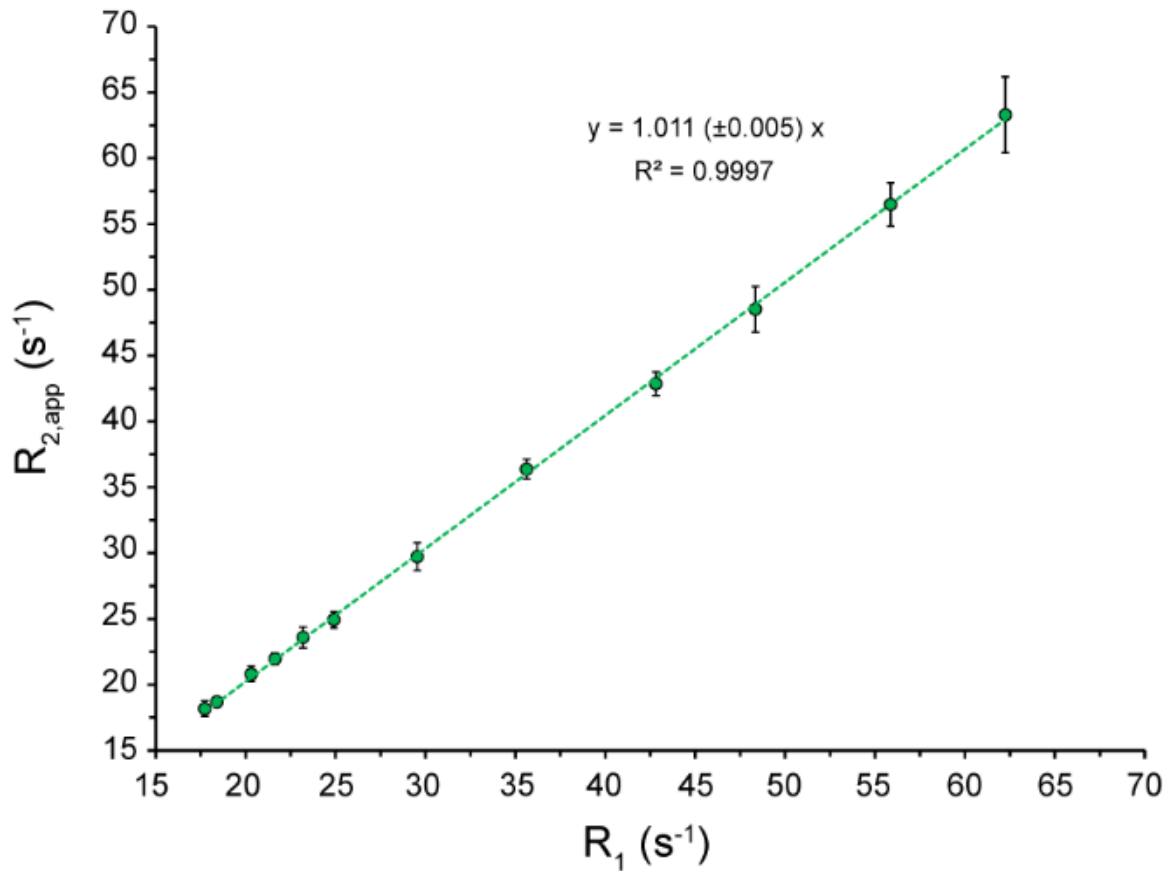

**Figure S4.** The <sup>23</sup>NaCl longitudinal relaxation ( $R_1$ ) and linewidth-based apparent transverse relaxation ( $R_{2,app}$ ) rates measured in the glycerol-water mixtures from 0 to ca. 40% (v/v) glycerol concentration. Strong correlation and a nice fit to a line with a slope close to 1 is observed. The error bars for  $R_{2,app}$  represent the standard deviation of multiple (at least five) measurements of linewidth. The error bars for  $R_1$  rates represent the fitting error and are smaller than the symbol size.

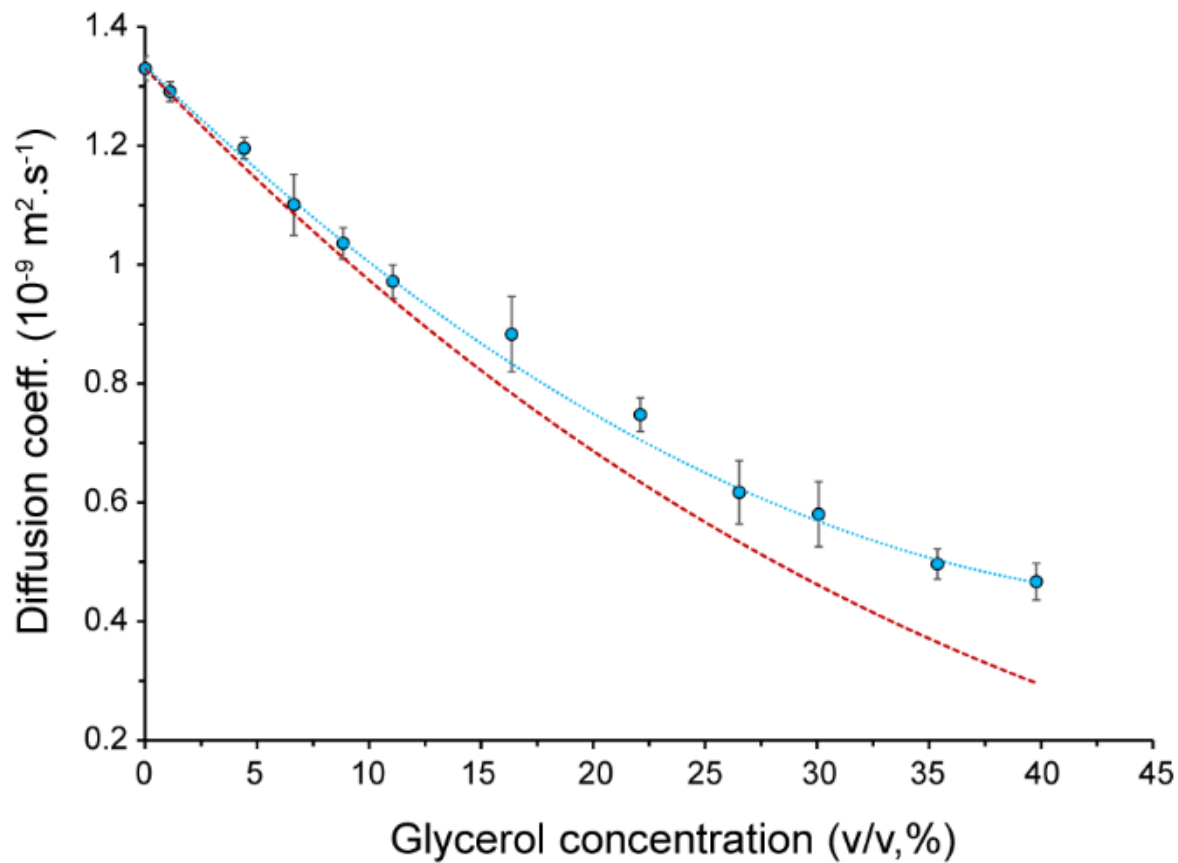

**Figure S5.**  $^{23}\text{NaCl}$  translational diffusion coefficient ( $D_{\text{tr}}$ ) as a function of glycerol concentration in glycerol-water mixtures. The decrease in  $D_{\text{tr}}$  is less pronounced than the glycerol concentration-dependent decrease in  $1/\eta$  (shown as dashed line in dark red). The error bars represent the fitting errors for diffusion coefficients.

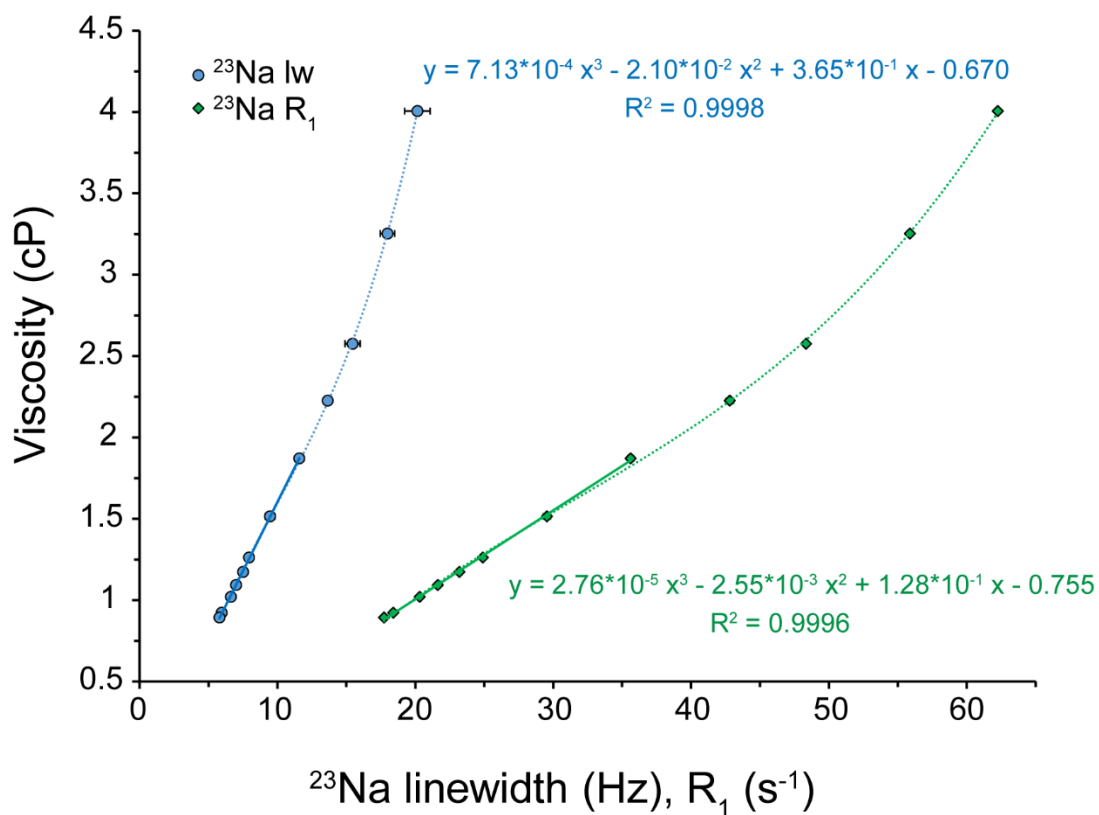

**Figure S6.** Viscosity determination based on  $^{23}\text{Na}$  NMR measurements in glycerol-water mixtures (0-40%, v/v). Viscosity variation by  $^{23}\text{Na}$  linewidth and longitudinal relaxation ( $R_1$ ) rates are fitted to cubic equations. The initial variation of viscosity by  $^{23}\text{Na}$  NMR linewidth or  $R_1$  rates follows linear trends (solid lines). The error bars for  $^{23}\text{Na}$   $R_1$  rates are smaller than the symbol size.

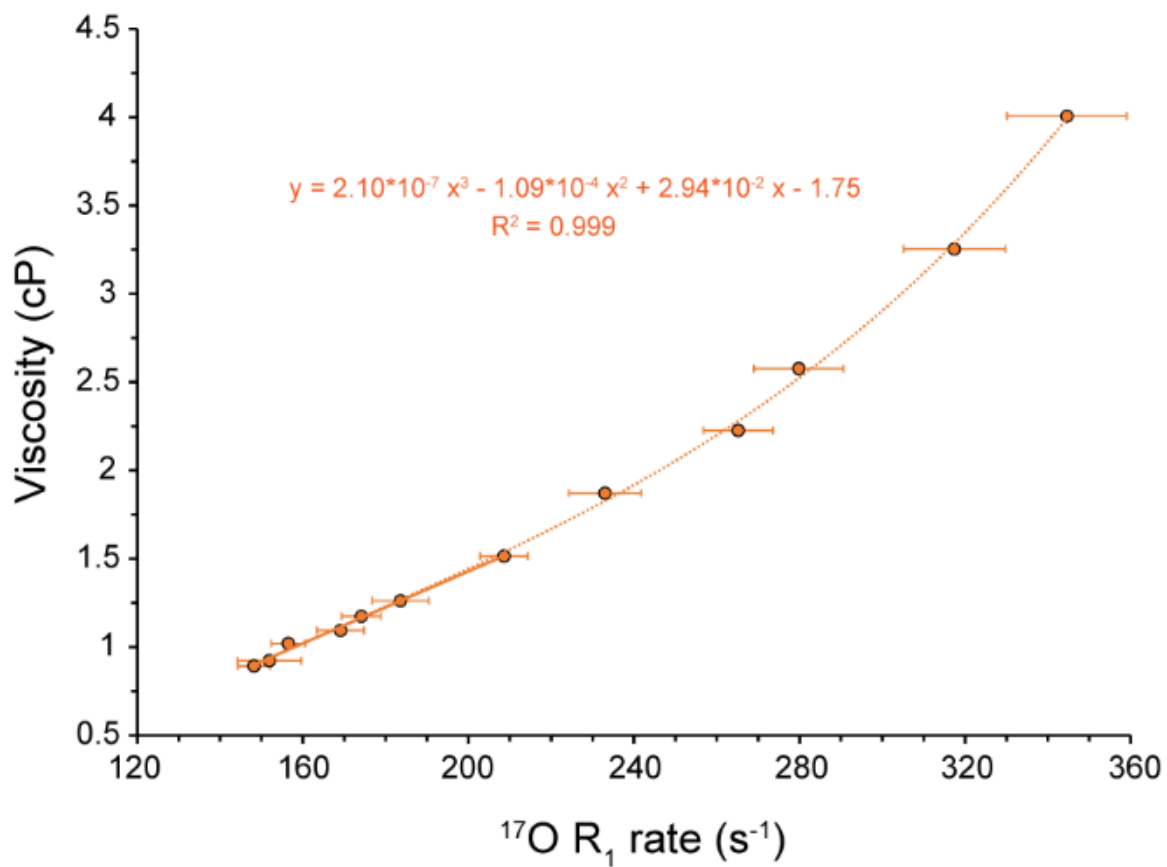

**Figure S7.** Viscosity determination based on  $^{17}\text{O}$  NMR measurements in glycerol-water mixtures (0-40%, v/v). Viscosity variation by  $^{17}\text{O } R_1$  rates of water is fitted to a cubic relation in the whole region, however the initial variation obeys a linear relation (solid line). The error bars represent the fitting errors for  $^{17}\text{O } R_1$  rates.



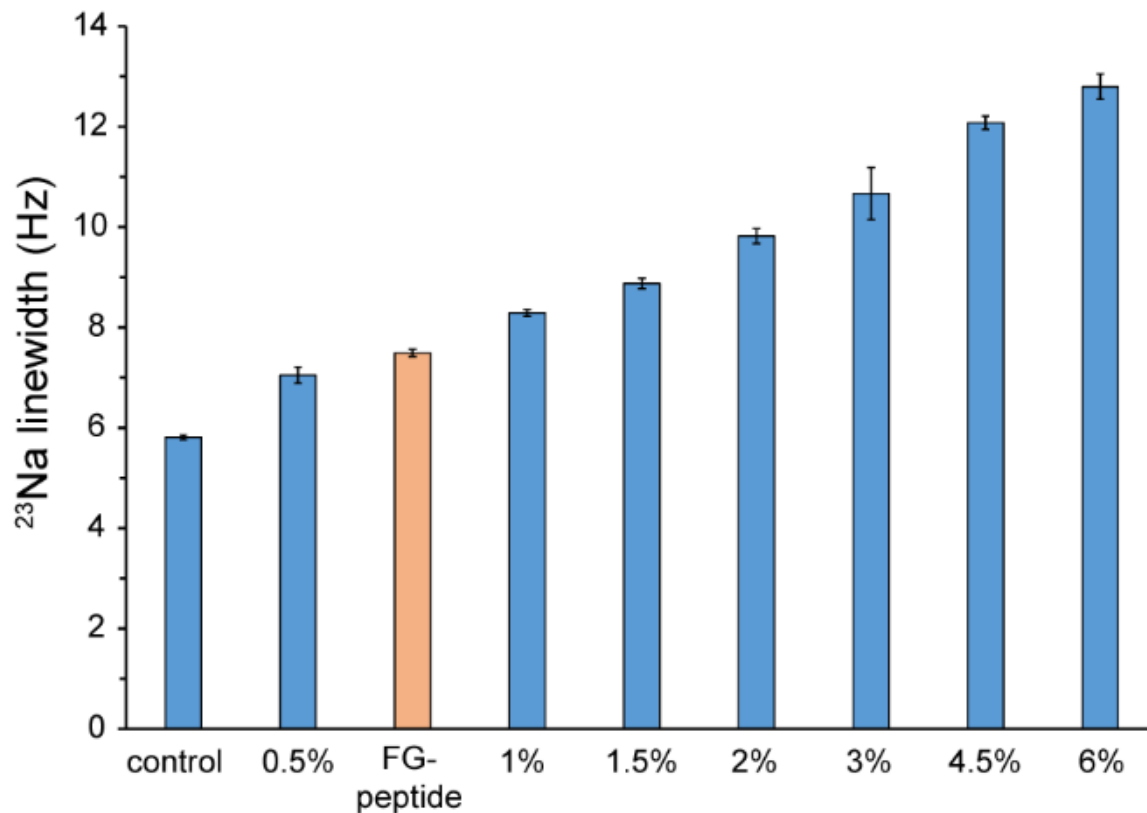

**Figure S8.**  $^{23}\text{NaCl}$  NMR probes of confinement level in biological hydrogels. The  $^{23}\text{Na}$  linewidth captures the agarose concentration-dependent restriction in rotational mobility of sodium ions. The degree of sodium ion (rotational) mobility inside FG-peptide hydrogel (3 mM) is revealed by its measured  $^{23}\text{NaCl}$  linewidth, in comparison with the agarose gels.

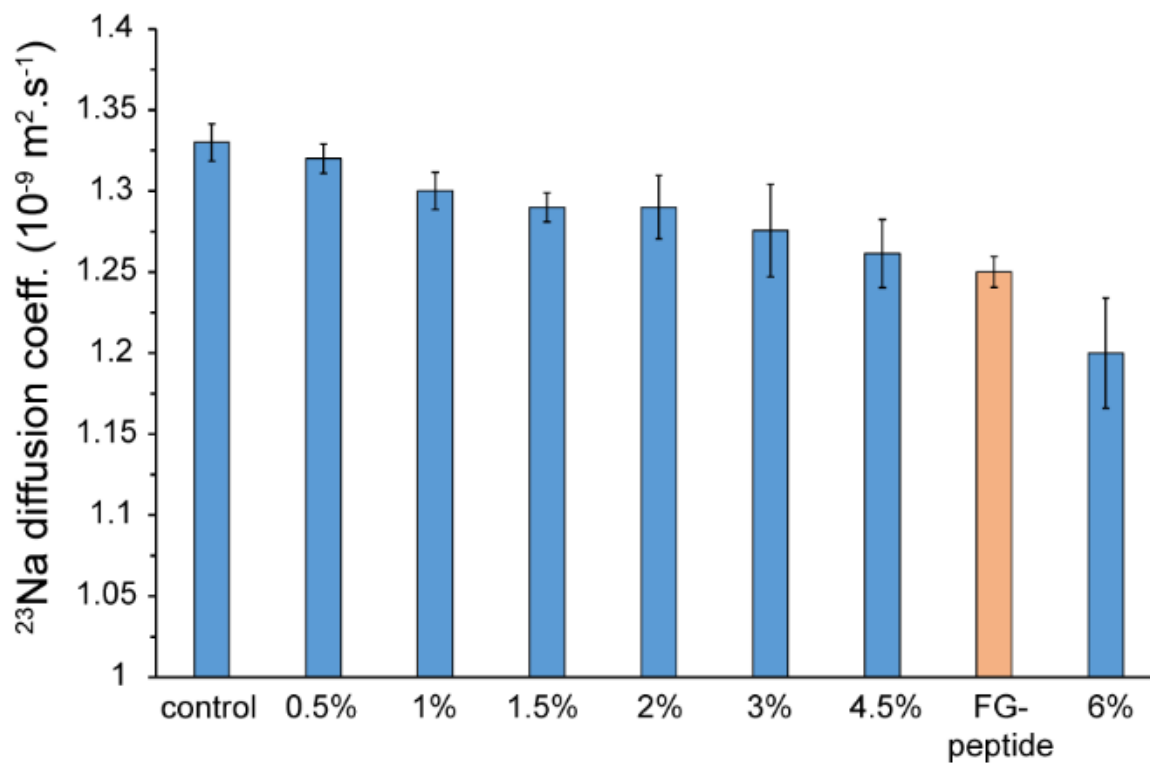

**Figure S9.**  $^{23}\text{NaCl}$  translational diffusion coefficient ( $D_{\text{tr}}$ ) slightly decreases in dependence of agarose gel concentration, reflecting considerable albeit small restriction in translational mobility of sodium ions. The degree of sodium ion (translational) mobility inside FG-peptide hydrogel is revealed by its measured  $^{23}\text{NaCl}$  diffusion coefficient, in comparison with the agarose gels.

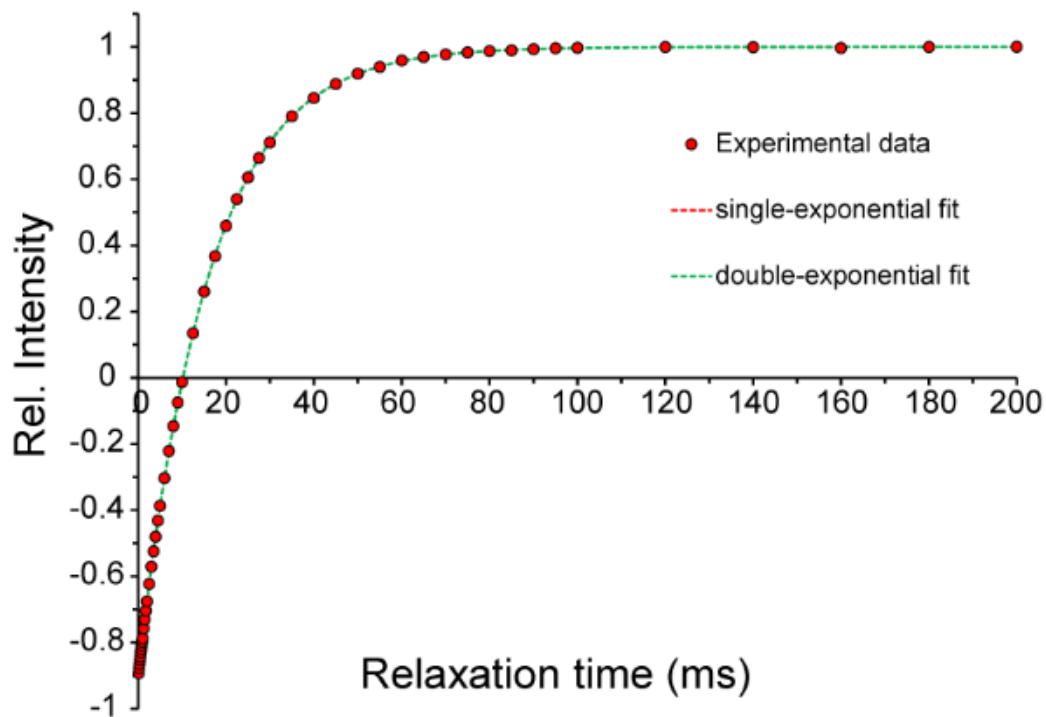

**Figure S10.**  $^{23}\text{Na}$  signal intensity recovery following 180-degree inversion in a 39.8% glycerol solution. The single- (red dashed line) and double-exponential (green dashed line) fits are indistinguishable, indicating that even at this sample exhibiting the largest  $^{23}\text{Na}$   $R_1$  rate in our study the  $^{23}\text{Na}$  NMR relaxation remains effectively single-exponential (as in fast “extreme-narrowing” regime).

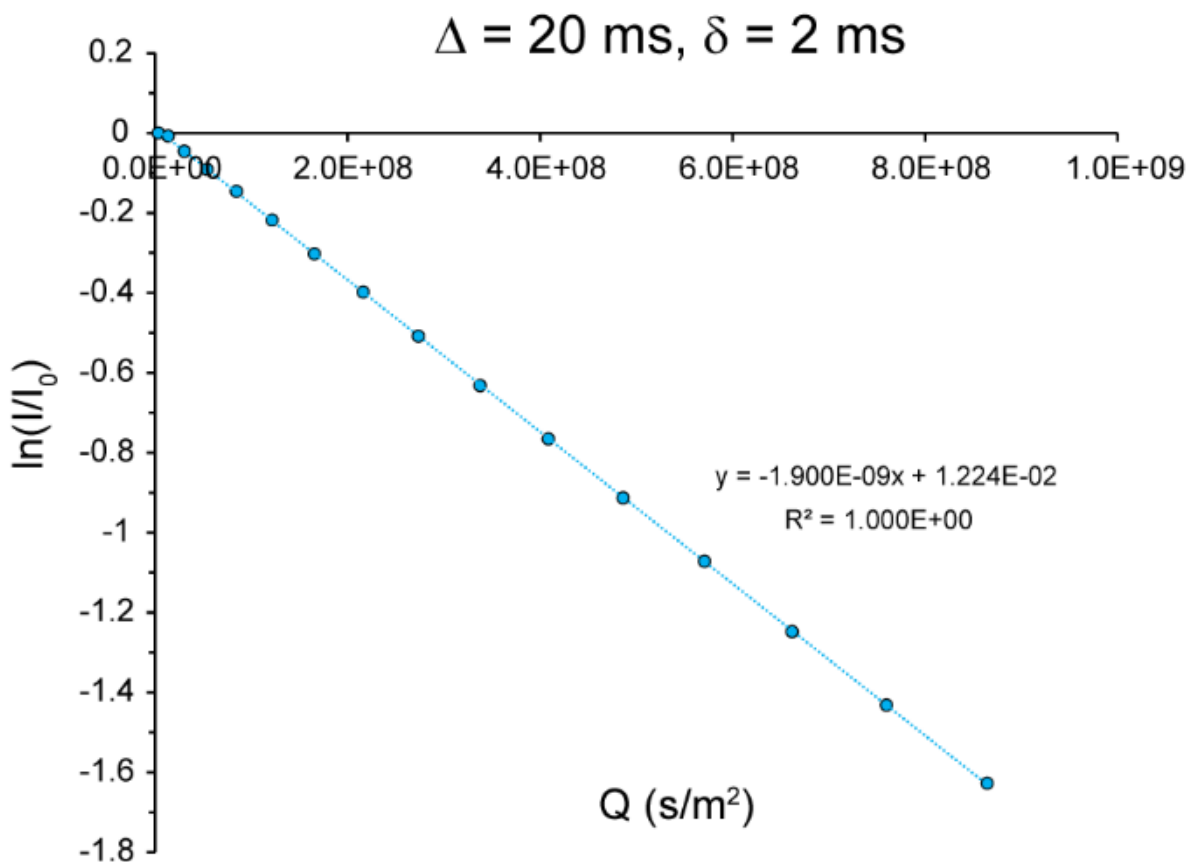

**Figure S11.** Gradient calibration through PFG-NMR measurement of residual HDO in 99.8% D<sub>2</sub>O at 298.14 K. The values of experimental diffusion times (big and little delta) are shown at top. The known value of HDO diffusion coefficient ( $1.9 \cdot 10^{-9} \text{ m}^2 \cdot \text{s}^{-1}$ ) was obtained after scaling nominal gradient values by 1.026.
